# Supplementary material
Source: PubMed Central journal article supplement (PMC4021437)
Supplement: supp_fj.13-246868_13-246868SuppData.pdf [file supp_fj.13-246868_13-246868SuppData.pdf]

**Table S1.**

Pharmacological characteristics of SCTR and AT1aR/SCTR oligomers after various treatments. Shown are the EC<sub>50</sub> values for secretin-stimulated intracellular cAMP responses in these cells, as well as E<sub>max</sub> and basal values compared with the maximal cAMP concentrations achieved in the SCTR transfected cells. Data represent the SEM of data from at least three experiments performed in triplicate.

| Receptors        | Treatment   | EC <sub>50</sub><br>(nM) | E <sub>max</sub><br>(% to SCTR<br>max) | Basal<br>(% to SCTR<br>max) |
|------------------|-------------|--------------------------|----------------------------------------|-----------------------------|
| SCTR             | No          | 0.98                     | 100.0±2.9                              | 14.0±2.9                    |
|                  | STM-II      | 0.78                     | 86.3±8.6                               | 16.4±8.4                    |
|                  | STM-IV      | 2.48                     | 56.7±6.0                               | 6.7±4.1                     |
|                  | STM-IVm     | 1.95                     | 106.0±4.4                              | 16.7±3.7                    |
|                  | ATM1        | 0.94                     | 97.4±4.7                               | 11.3±5.0                    |
|                  | ATM4        | 0.56                     | 55.1±2.1                               | 1.2±2.5                     |
|                  | ATM4m       | 0.81                     | 103.4±5.3                              | 19.4±5.6                    |
|                  | ANGII       | 1.32                     | 102.4±6.1                              | 14.4±5.6                    |
| AT1aR/SCTR       | No          | 0.92                     | 66.1±3.0                               | 6.2±2.8                     |
|                  | No (1μg)    | 1.56                     | 81.2±4.4                               | 12.4±3.9                    |
|                  | STM-II      | 1.61                     | 61.7±2.7                               | 6.3±2.3                     |
|                  | STM-IV      | 1.33                     | 50.2±4.8                               | 4.2±4.2                     |
|                  | ATM1        | 0.98                     | 73.5±3.4                               | 10.1±3.4                    |
|                  | ATM4        | 0.73                     | 40.6±2.9                               | 2.9±3.2                     |
|                  | ANGII       | 1.85                     | 104.5±3.3                              | 14.4±2.6                    |
|                  | ANGII+ATM1  | 0.91                     | 59.0±3.4                               | 4.8±3.7                     |
|                  | ANGII+ATM1m | 3.31                     | 101.2±4.2                              | 19.4±3.2                    |
| AT2R/SCTR        | No          | 1.49                     | 111.2±5.4                              | 10.3±4.7                    |
| AT1aR-CAM/SCTR   | No          | 0.62                     | 100.7±3.6                              | 16.0±3.6                    |
| AT1aR-K199A/SCTR | No          | 0.72                     | 73.1±2.9                               | 11.7±2.9                    |
|                  | ANGII       | 0.94                     | 69.0±3.7                               | 11.9±3.8                    |

**Table S2**

The sequences of the transmembrane peptides used in this study. The mutated sequences are underlined.

| Receptor | Name                                                      | Sequence                                                 |
|----------|-----------------------------------------------------------|----------------------------------------------------------|
| SCTR     | STM-I                                                     | KKMYTVGYSSSLAMLLVALSILCSFKK                              |
|          | STM-II                                                    | KKIHMHLFVVSFILRALS <sup>II</sup> NFIKDAVLKK              |
|          | STM-III                                                   | KKLVMIFFQY <sup>II</sup> CIMANYAWLLVEGLYKK               |
|          | STM-IV                                                    | LQAFVLF <sup>II</sup> GWGSPAIFVALWAVTRHFLE               |
|          | STM-IVm                                                   | LQAFVLAGWASPAAFVALWAA <sup>II</sup> TRHFLE               |
|          | STM-V                                                     | KKWWVIRGPVILS <sup>II</sup> VINFIFFINILKK                |
|          | STM-VI                                                    | KKSTLLLIPLFGIHYIVFAFSPEGAKK                              |
|          | STM-VII                                                   | KKLFFELALGSFQGLVVAVLYCFLNKK                              |
| AT1aR    | ATM1                                                      | KKIPTLYSIIIFVVGIFGNSLVVIVIKK                             |
|          | ATM1m                                                     | KKIPTA <sup>II</sup> YSIAFVAGIFANSLVVIVIKK               |
|          | ATM2                                                      | KKFLNLALADLCFL <sup>II</sup> TLPLWAVYTKK                 |
|          | ATM3                                                      | KKIASASVSFNLYASV <sup>II</sup> LLTCLKK                   |
|          | ATM4                                                      | KKLVAKVTCIIIWLMAGLASLPAV <sup>II</sup> IKK               |
|          | ATM4m                                                     | KKAVAKATCIIIWAMAGAASAPLV <sup>II</sup> IKK               |
|          | ATM5                                                      | KKILGFLFPFLI <sup>II</sup> LTSYTLIKK                     |
|          | ATM6                                                      | KKIFRIIMAI <sup>II</sup> VLFFF <sup>II</sup> SWVPHQIFTKK |
| ATM7     | KKAMPITICIA <sup>II</sup> YFN <sup>II</sup> NCLNPLFYGFLKK |                                                          |

SFig. 1

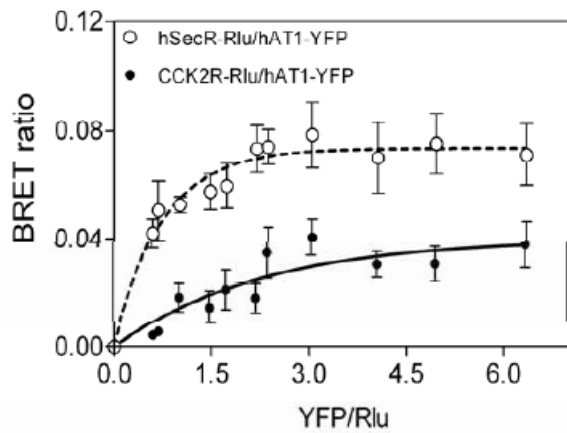

SFig. 1 Heteromer formation of human SCTR with AT1R.

The BRET saturation curves are plotted as a ratio of YFP- and Rlu-tagged constructs in the transfection. A fixed amount of human SCTR-Rlu, control CCK2R-Rlu, and increasing amounts of human AT1R-YFP were co-transfected into CHO cells. Similar to data for the mouse receptors, the human SCTR-Rlu and AT1R-YFP co-transfected cells produced an exponential curve for the YFP/Rlu ratio that reached an asymptote, consistent with a saturable BRET signal. In the control experiment, the cells with SCTR-Rlu and CCK2R-YFP did not produce a significant saturation curve. Values are expressed as mean  $\pm$  SEM, with duplicate data from at least four experiments.

SFig. 2

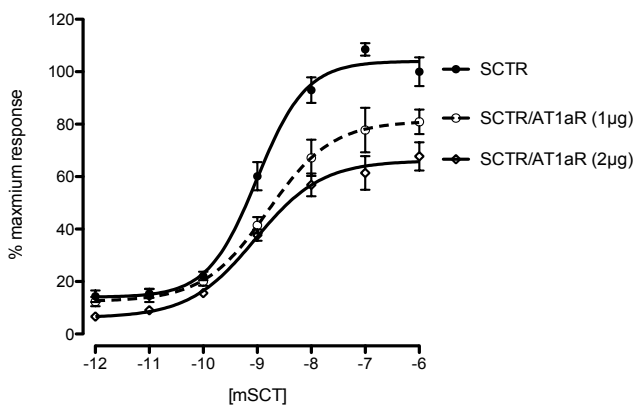

SFig. 2 The dose-dependent effects of AT1aR on the efficacy of cAMP production through the SCTR.

Maximal cAMP levels induced by SCT in mouse SCTR-transfected cells were set as 100%. Co-expression of AT1aR with SCTR reduced the maximal responses in cAMP production of the SCTR. This drop in efficacy was dose-dependent, as demonstrated by using 1 mg or 2 mg of AT1aR in the co-transfection.

SFig. 3

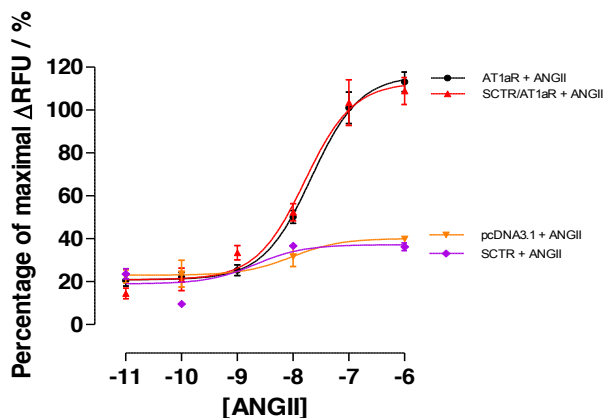

SFig. 3 Co-expression of SCTR and AT1aR had no effect on  $Ca^{2+}$  signaling through the AT1aR in response to ANGII.

Effects of mouse ANGII on the intracellular  $[Ca^{2+}]_i$  mobilization in the cells transfected with various combination of receptors were monitored fluorometrically by using a calcium-sensitive probe fluo 4-AM. Data were expressed in mean  $\pm$  SEM of delta changes in the fluorescence signals from baseline and converted to percentages of the maximum of ANGII-induced  $[Ca^{2+}]_i$  elevation in AT1aR-transfected cells. The co-expression of SCTR with AT1aR did not cause a significant change in  $Ca^{2+}$  signaling when compared to the cells transfected with AT1aR alone.

SFig. 4

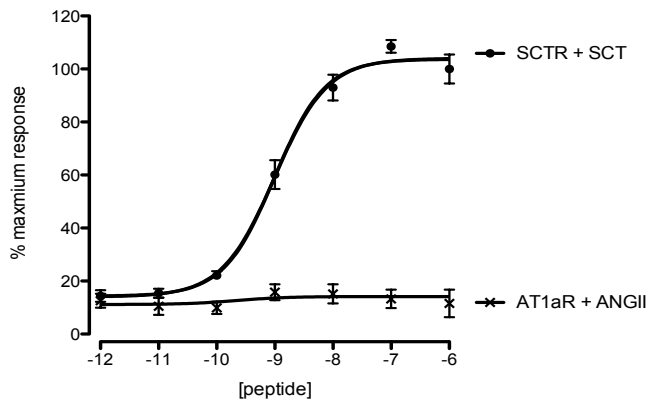

**SFig. 4 ANGII is unable to stimulate cAMP accumulation in AT1aR-transfected cells.**

Intracellular cAMP accumulation was measured in SCTR- or AT1aR- transfected cells in response to graded concentrations of SCT or ANGII, respectively. SCT stimulated robust cAMP accumulation in SCTR-transfected cells, while ANGII was unable to activate cAMP production in AT1aR-transfected cells. Values are expressed as mean  $\pm$  SEM, with duplicate data from at least three experiments.

SFig. 5

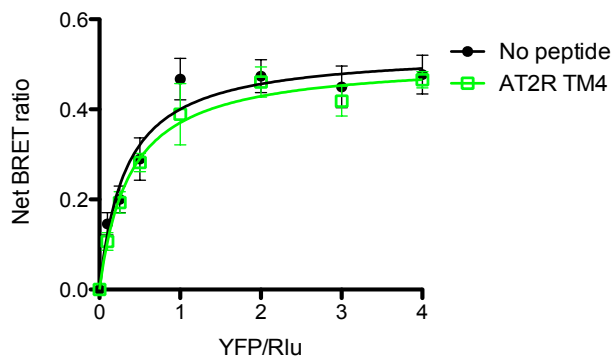

**SFig. 5 Effects of AT2R-TM4 peptides on formation of SCTR-AT1aR hetero-complexes.**

SCTR-Rlu and AT1aR-YFP co-transfected cells were treated with AT2R-TM4 peptides. No significant change of the net BRET ratios was observed by saturation BRET studies. Values are expressed as mean  $\pm$  SEM, with duplicate data from at least two experiments.

SFig. 6

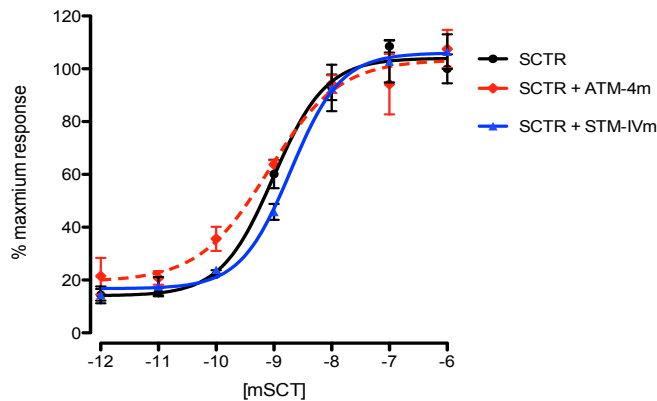

**SFig. 6 Mutated TM4 peptides did not alter cAMP signaling of SCTR.**

The mutated TM peptides (ATM-4m and STM-IVm) were used to treat the cells expressing SCTR. Neither peptide affected the cAMP signaling of SCTR-transfected cells. Data are expressed as mean  $\pm$  SEM with duplicate data points from at least three experiments.

SFig. 7

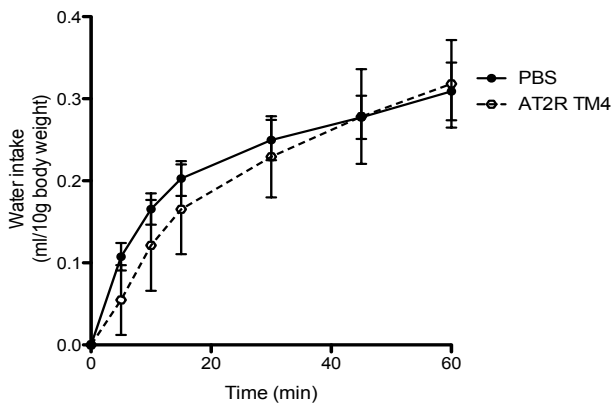

**SFig. 7 The AT2R-TM4 peptides did not inhibit hyperosmolality-induced drinking in mice.**

The effect of AT2R-TM4 on hyperosmolality-induced drinking was studied by i.c.v. injection of the peptide (4  $\mu$ g in 5  $\mu$ l) vs. controls (5  $\mu$ l PBS or vehicle control 20% DMSO in PBS) into the lateral ventricle 15 minutes after hyperosmotic shock. When compared with the control, no significant change in water intake can be observed after AT2R-TM4 peptide injection. Data are expressed as mean  $\pm$  SEM with duplicate data points from two experiments.

SFig. 8

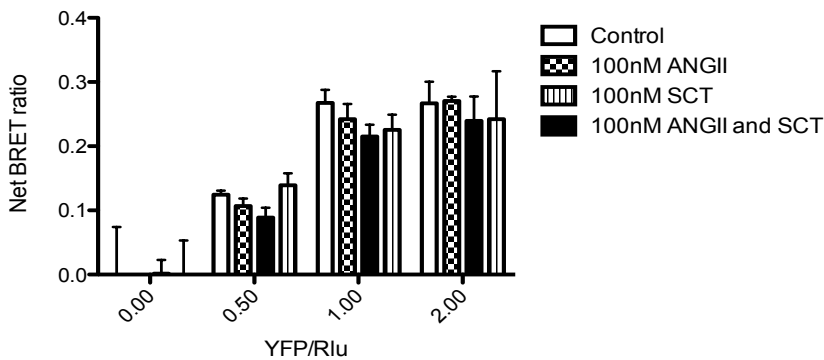

**SFig. 8 SCT and ANGII treatment did not reduce the BRET signal of the heteromer.**

Fixed amount of mouse SCTR-Rlu and mouse AT1aR-YFP (0, 0.5, 1.0 and 2.0 mg) were co-transfected into CHO cells. The receptors transfected cells were treated with either SCT or ANGII or SCT and ANGII co-treatment (100 nM) for 45 min before the BRET reading. There were no significant changes of the BRET ratio after all the treatments. Values are expressed as mean  $\pm$  SEM, with duplicate data from at least 2 experiments.
